# Supplementary material for: Assessing the impact of mental health difficulties on young people’s daily lives: protocol for a scoping umbrella review of measurement instruments
Source: HighWire-hosted journal article supplement (doi:10.1136/bmjopen-2021-054679), 2022-04-01
Supplement: bmjopen-2021-054679supp002_data_supplement.pdf [file bmjopen-2021-054679supp002_data_supplement.pdf]

## Assessing the Impact of Mental Health Difficulties on Young People's Daily Lives: Protocol for a Scoping Umbrella Review of Measurement Instruments

### Search strategy for Ovid MEDLINE(R)

- 1 mental health/
- 2 social adjustment/
- 3 mental disorders/ or exp anxiety disorders/ or exp "bipolar and related disorders"/ or exp "disruptive, impulse control, and conduct disorders"/ or exp dissociative disorders/ or exp "feeding and eating disorders"/ or exp mood disorders/ or exp "attention deficit and disruptive behavior disorders"/ or exp child behavior disorders/ or exp schizophrenia, childhood/ or exp neurotic disorders/ or exp personality disorders/ or exp "schizophrenia spectrum and other psychotic disorders"/ or exp somatoform disorders/ or exp substance-related disorders/ or exp "trauma and stressor related disorders"/
- 4 (mood disorder\* or affective disorder\* or personality disorder\* or depressive disorder\* or major depression or anxiety disorder\* or obsessive compulsive or bipolar or schizo\* or "substance use disorder\*" or addiction\* or conduct disorder\* or behavior?r\* disorder or stress disorder\* or PTSD or CPTSD or complex trauma or developmental trauma).ti,ab,kf.
- 5 ((mental\* or psychiatr\* or internalizing or externalizing or psychosocial or psycho-social) adj3 (diagnos\* or disorder\* or ill or illness\* or problem\* or challenge\* or issue\* or difficult\*).ti,ab,kf.
- 6 (mental health or wellbeing or well-being).ti,kf.
- 7 or/1-6
- 8 (child\* or pediatric\* or paediatric\* or youngster\* or youth\* or adolescen\* or teen\* or young adult\* or young person\* or young people\* or juvenile\* or student\* or underage\* or under-age\* or emerging adult\* or transition\* age\*).ti,kf,hw,jn.
- 9 Psychometrics/
- 10 "Outcome Assessment (Health Care)"/
- 11 Psychiatric Status Rating Scales/
- 12 "Surveys and Questionnaires"/
- 13 self report/
- 14 Mass Screening/
- 15 psychometr\*.ti,ab,kf.
- 16 (clinimetr\* or clinometr\*).ti,ab,kf.
- 17 ((outcome\* or rating or screening) adj2 (assessment\* or scale\*)).ti,kf.
- 18 measure\*.ti,kf.
- 19 questionnaire\*.ti,kf.
- 20 instrument\*.ti,kf.
- 21 (("quality of life" or HRQL or HRQoL or QL or QoL or health profile\* or health status\* or global health or disabilit\* or disabl\* or function\* or wellbeing or well being or flourish\* or life satisfaction or impair\* or interference or life impact\* or adjust\* or adapt\* or standardi?ed or personali?ed or nomothetic or idiographic or self-report\* or patient report\* or child report\* or youth report\* or parent report\* or clinician report\* or mental health) adj3 (assess\* or index or

indices or instrument or instruments or measur\* or questionnaire\* or profile\* or scale\* or score\* or status\* or survey\* or apprais\* or metric\* or inventor\* or tool\* or indicator\*)),ti,kf.

22 (health index\* or health indices).ti,ab,kf,hw.

23 (PROM or PROMS).ti,ab,kf.

24 (HR-PRO or HRPRO).ti,ab,kf.

25 or/9-24

26 exp "Review Literature as Topic"/

27 "systematic review"/ (

28 meta-analysis/

29 (systematic review or scoping review or literature review or rapid review or narrative review or meta-analysis or metaanalysis).ti,ab,kf,hw,pt.

30 ("review of reviews" or "overview of reviews").ti,ab,kf.

31 ((review\* or map\*) adj5 (tool\* or instrument\* or scale\* or measur\*)),ti,ab,kf.

32 (literature adj3 review\*).ti,ab,kf.

33 or/26-32

34 7 and 8 and 25 and 33

35 limit 34 to yr="1990 -Current"

\*\*\*\*\*
